# Supplementary material for: Conformational dynamics between transmembrane domains and allosteric modulation of a metabotropic glutamate receptor
Source: eLife journal article supplement (doi:10.7554/elife.45116), 2019-06-07

## Figure 2-figure supplement 2

**A** *SNAP-mGluR3-TMD*

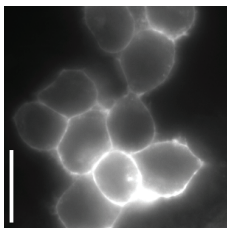

*SNAP-mGluR5-TMD*

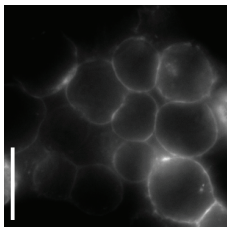

*SNAP-mGluR1-TMD*

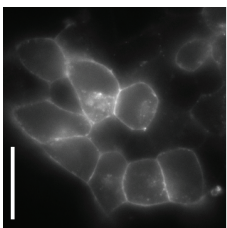

*SNAP- $\beta_2$ AR*

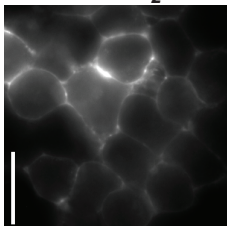

**B** *SNAP-mGluR3-TMD*

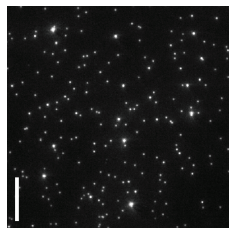

*SNAP-mGluR5-TMD*

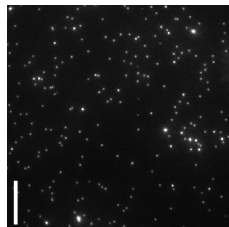

*SNAP-mGluR1-TMD*

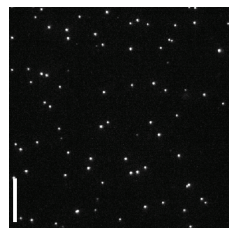

*SNAP- $\beta_2$ AR*

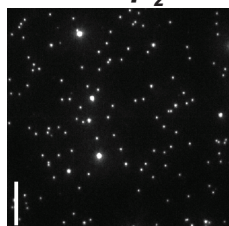

Supplement: supp [file elife-45116-supp-v1.zip]
