# Supplementary material for: Conformational dynamics between transmembrane domains and allosteric modulation of a metabotropic glutamate receptor
Source: eLife journal article supplement (doi:10.7554/elife.45116), 2019-06-07
Supplement: supp [file elife-45116-supp-v1.zip]

Archive with 18 entries (18 files):
- elife_poa_e45116_Figure_4_figure_supplement_1.pdf
- elife_poa_e45116_Figure_2_figure_supplement_1.pdf
- elife_poa_e45116_Figure_3_figure_supplement_1.pdf
- elife_poa_e45116_Figure_4_figure_supplement_2.pdf
- elife_poa_e45116_Figure_3_figure_supplement_2.pdf
- elife_poa_e45116_Figure_6_figure_supplement_1.pdf
- elife_poa_e45116_Figure_6_figure_supplement_2.pdf
- elife_poa_e45116_Figure_5_figure_supplement_1.pdf
- elife_poa_e45116_Figure_6_figure_supplement_3.pdf
- elife_poa_e45116_Figure_7_figure_supplement_1.pdf
- elife_poa_e45116_Figure_4_figure_supplement_3.pdf
- elife_poa_e45116_Figure_1_figure_supplement_1.pdf
- elife_poa_e45116_Figure_1_figure_supplement_2.pdf
- elife_poa_e45116_Figure_1_figure_supplement_3.pdf
- elife_poa_e45116_Figure_2_figure_supplement_3.pdf
- elife_poa_e45116_Transparent_Reporting_File.pdf
- elife_poa_e45116_Figure_3_figure_supplement_3.pdf
- elife_poa_e45116_Figure_2_figure_supplement_2.pdf
