# Supplementary figures and images for: Conformational dynamics between transmembrane domains and allosteric modulation of a metabotropic glutamate receptor
Source: eLife journal article supplement (doi:10.7554/elife.45116), 2019-06-07

**Figure 3-figure supplement 3**

**A**

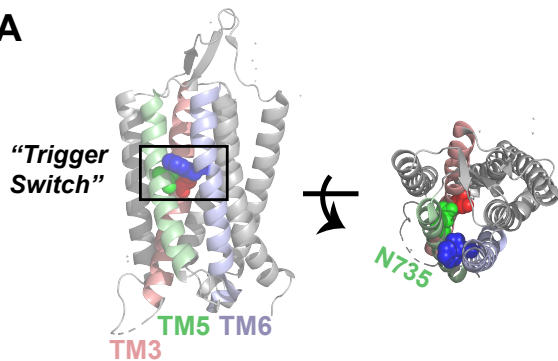

**B**

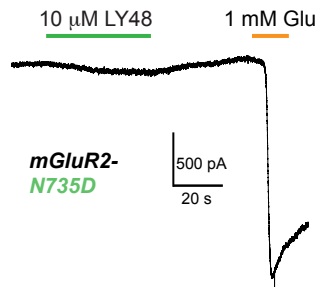

**C**

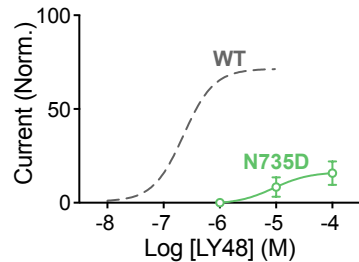

**D**

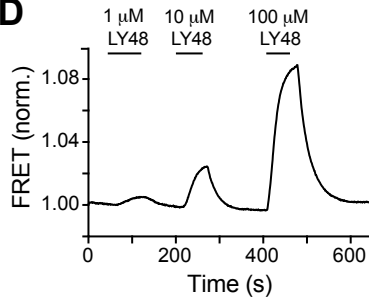

**E**

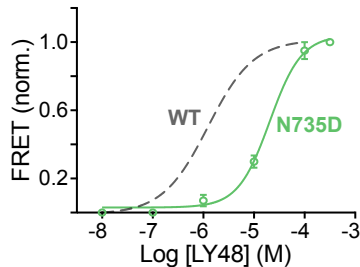

Supplement: supp [file elife-45116-supp-v1.zip]

# Figure 5-figure supplement 1

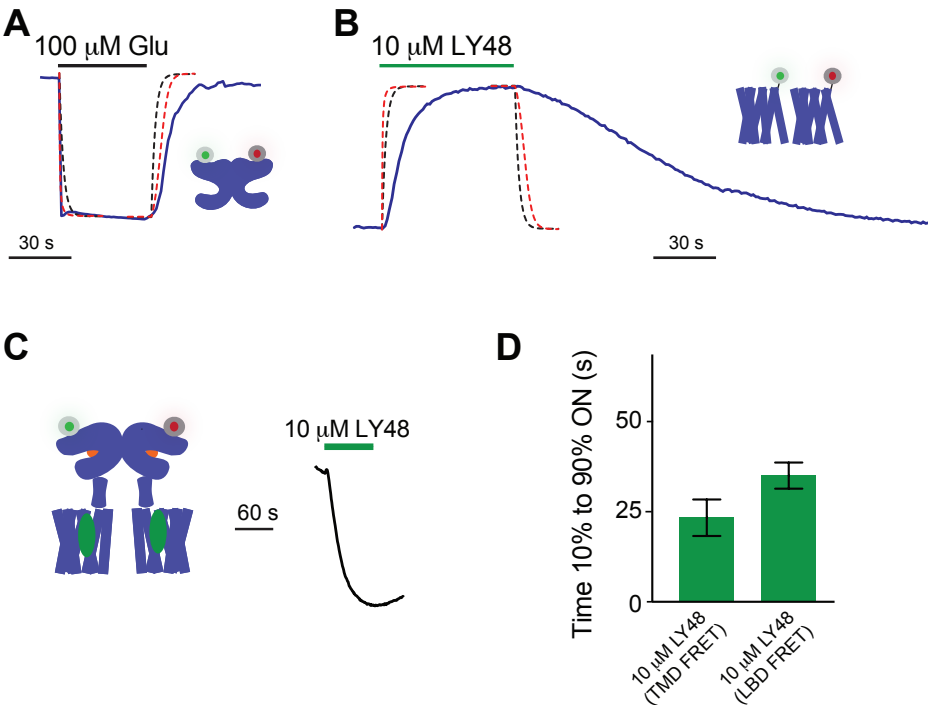

Supplement: supp [file elife-45116-supp-v1.zip]

## Figure 1-figure supplement 2

**A**

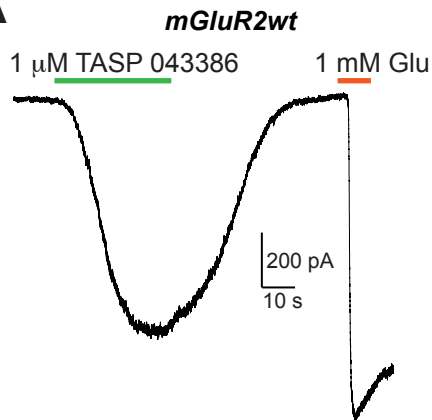

**B**

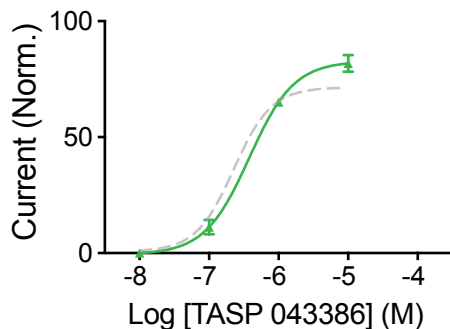

**C**

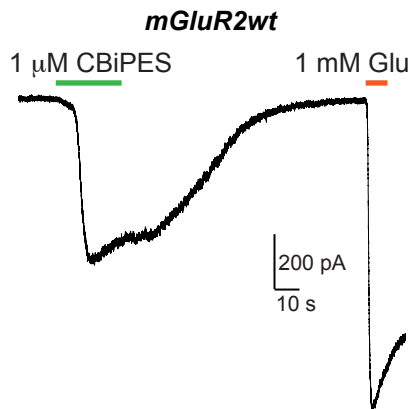

**D**

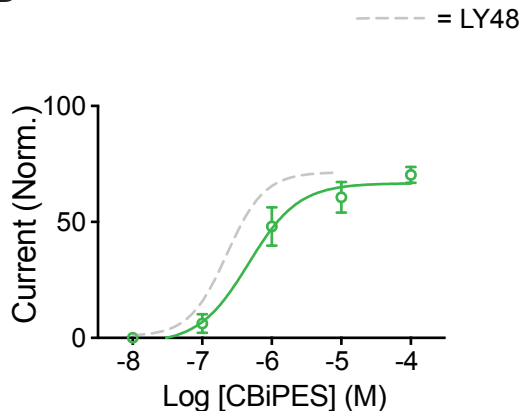

Supplement: supp [file elife-45116-supp-v1.zip]

**Figure 4-figure supplement 1**

**A**

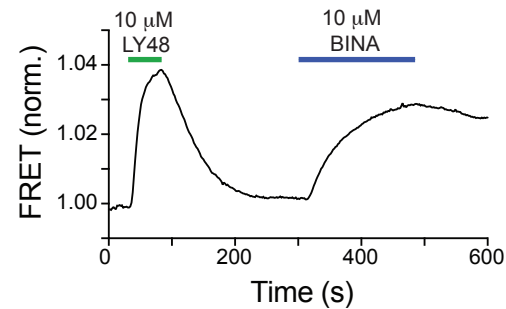

**B**

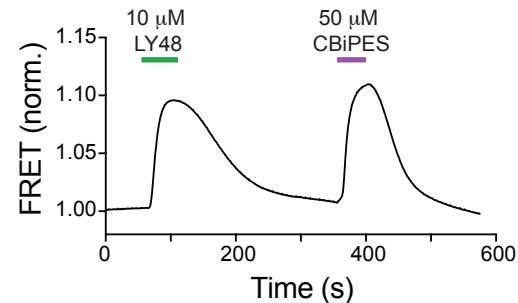

**C**

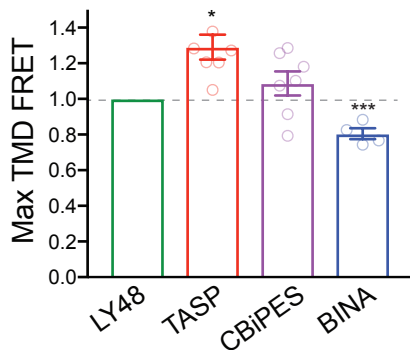

Supplement: supp [file elife-45116-supp-v1.zip]

**Figure 3-figure supplement 1**

**A**

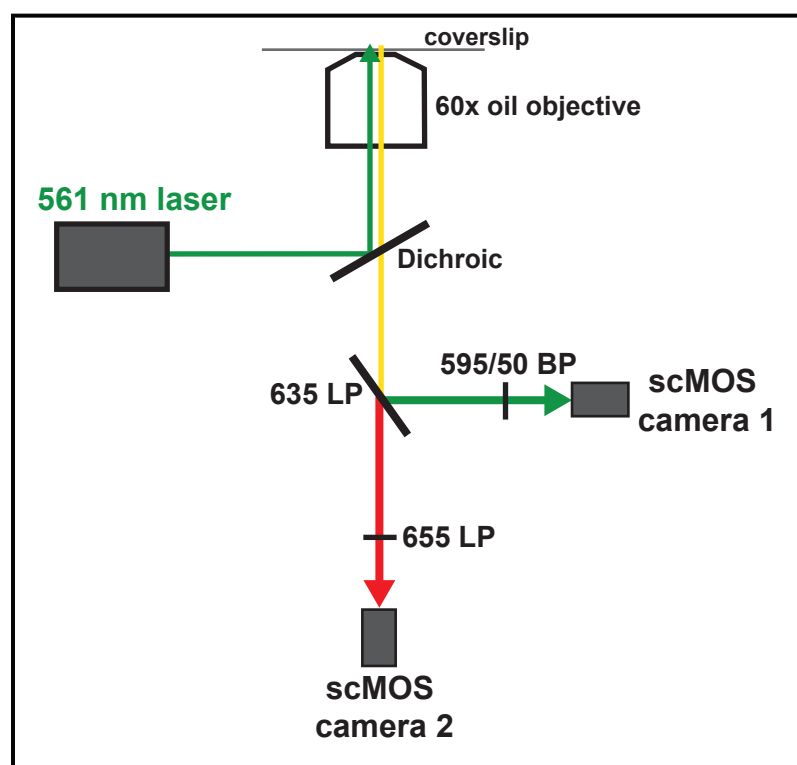

**B**

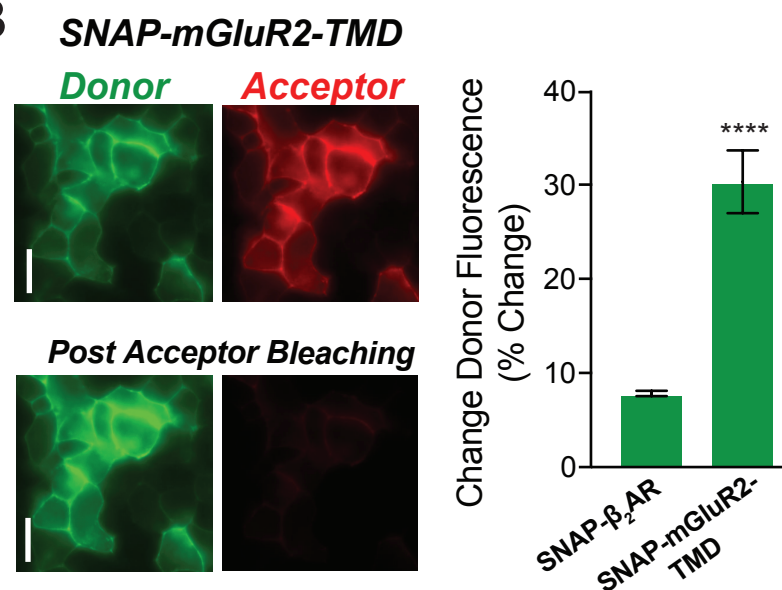

**C**

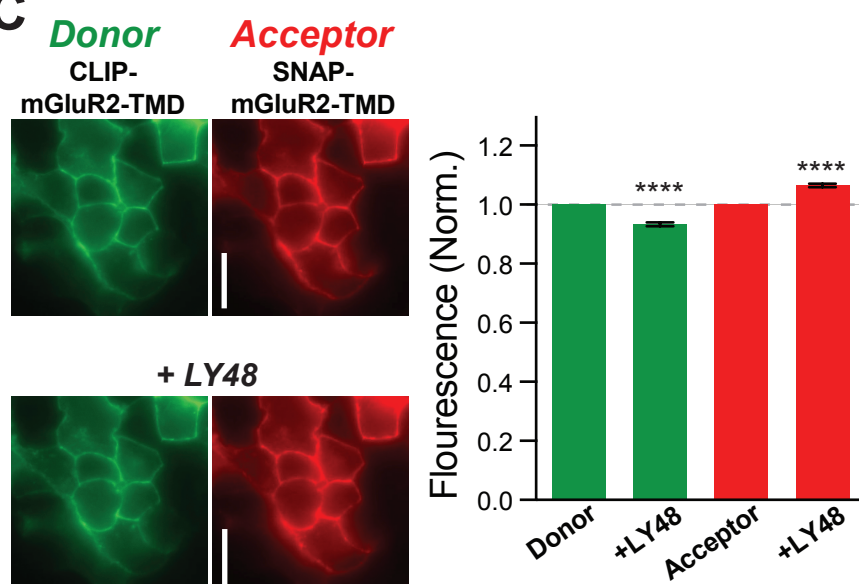

**D**

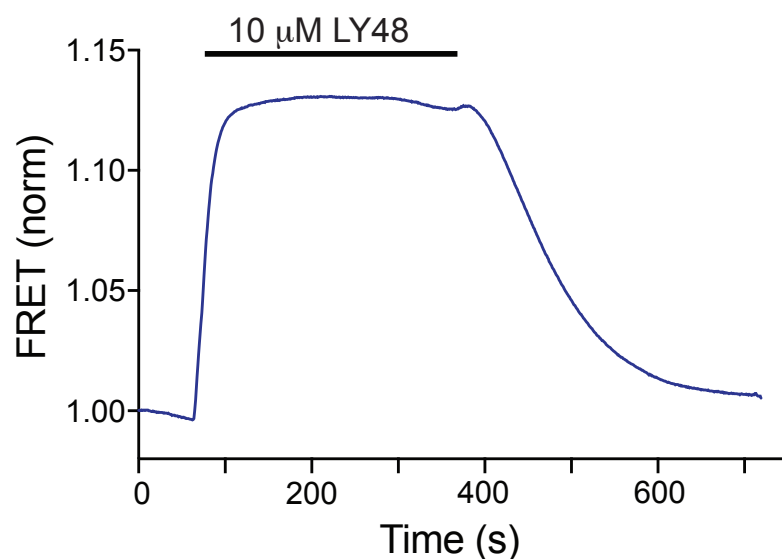

**E**

**SNAP-mGluR2-TMD**

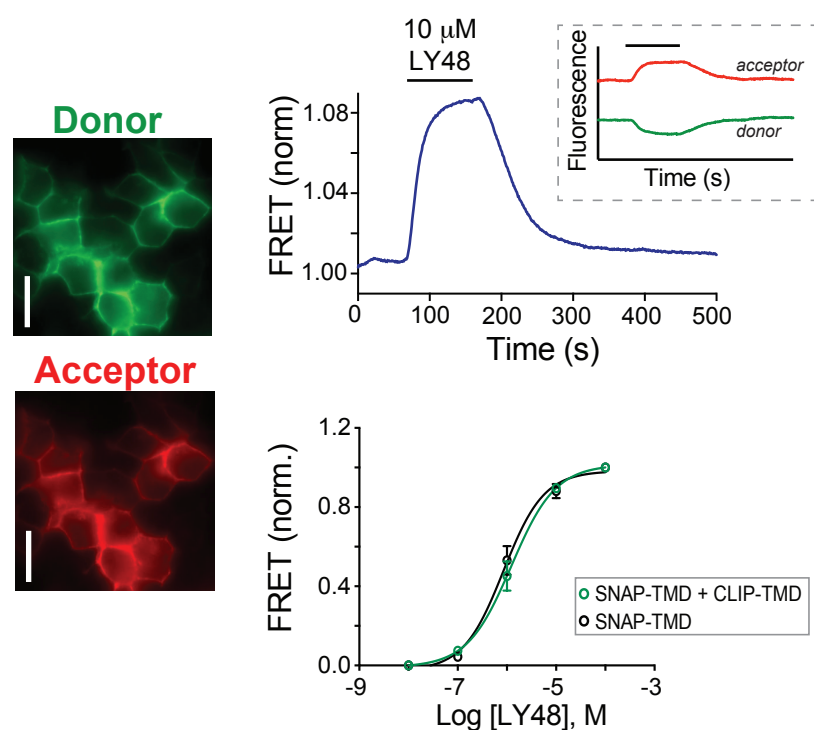

**F**

**SNAP-mGluR5-TMD**

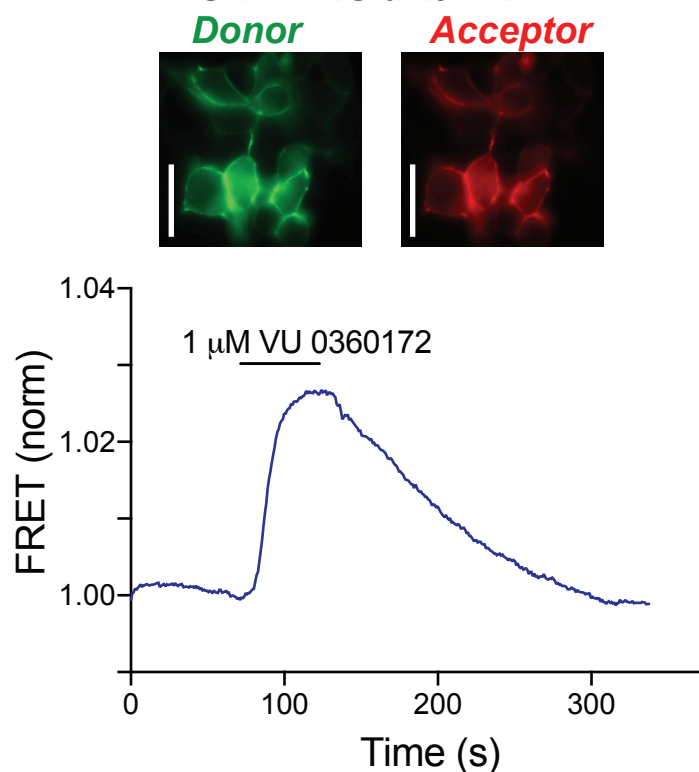

Supplement: supp [file elife-45116-supp-v1.zip]

# Figure 3-figure supplement 2

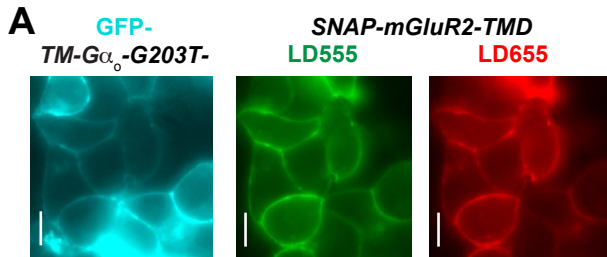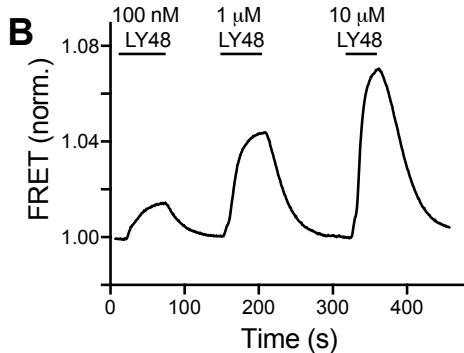

Supplement: supp [file elife-45116-supp-v1.zip]

# Figure 4-figure supplement 3

**A**

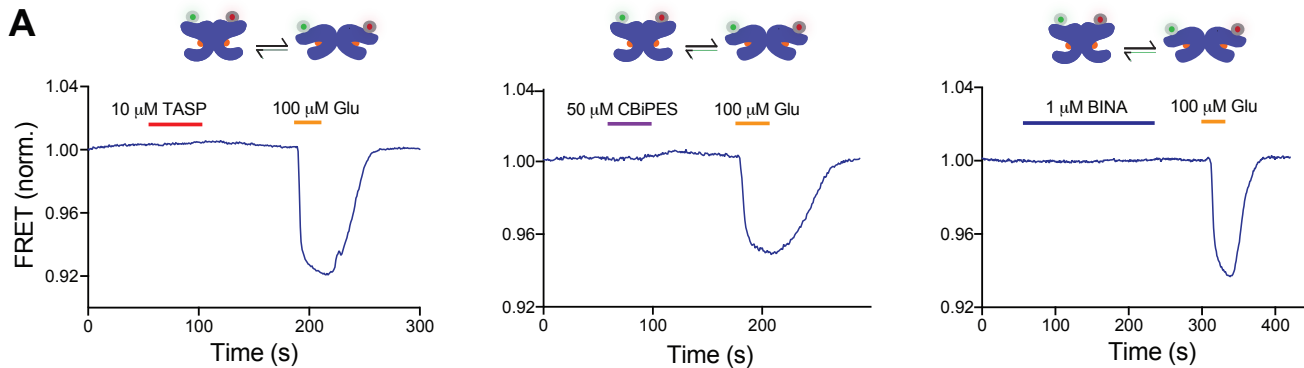

**B**

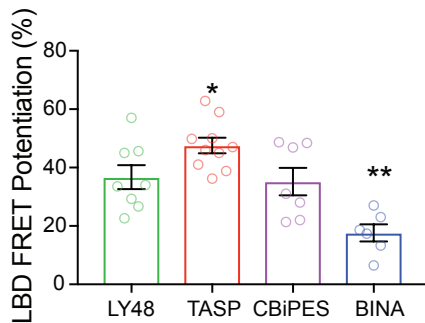

**C**

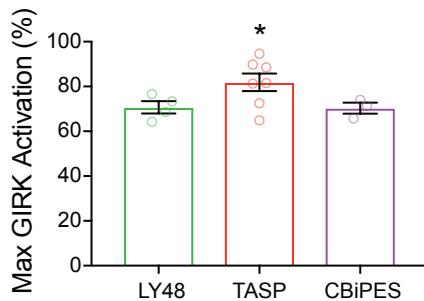

Supplement: supp [file elife-45116-supp-v1.zip]

**Figure 1-figure supplement 1**

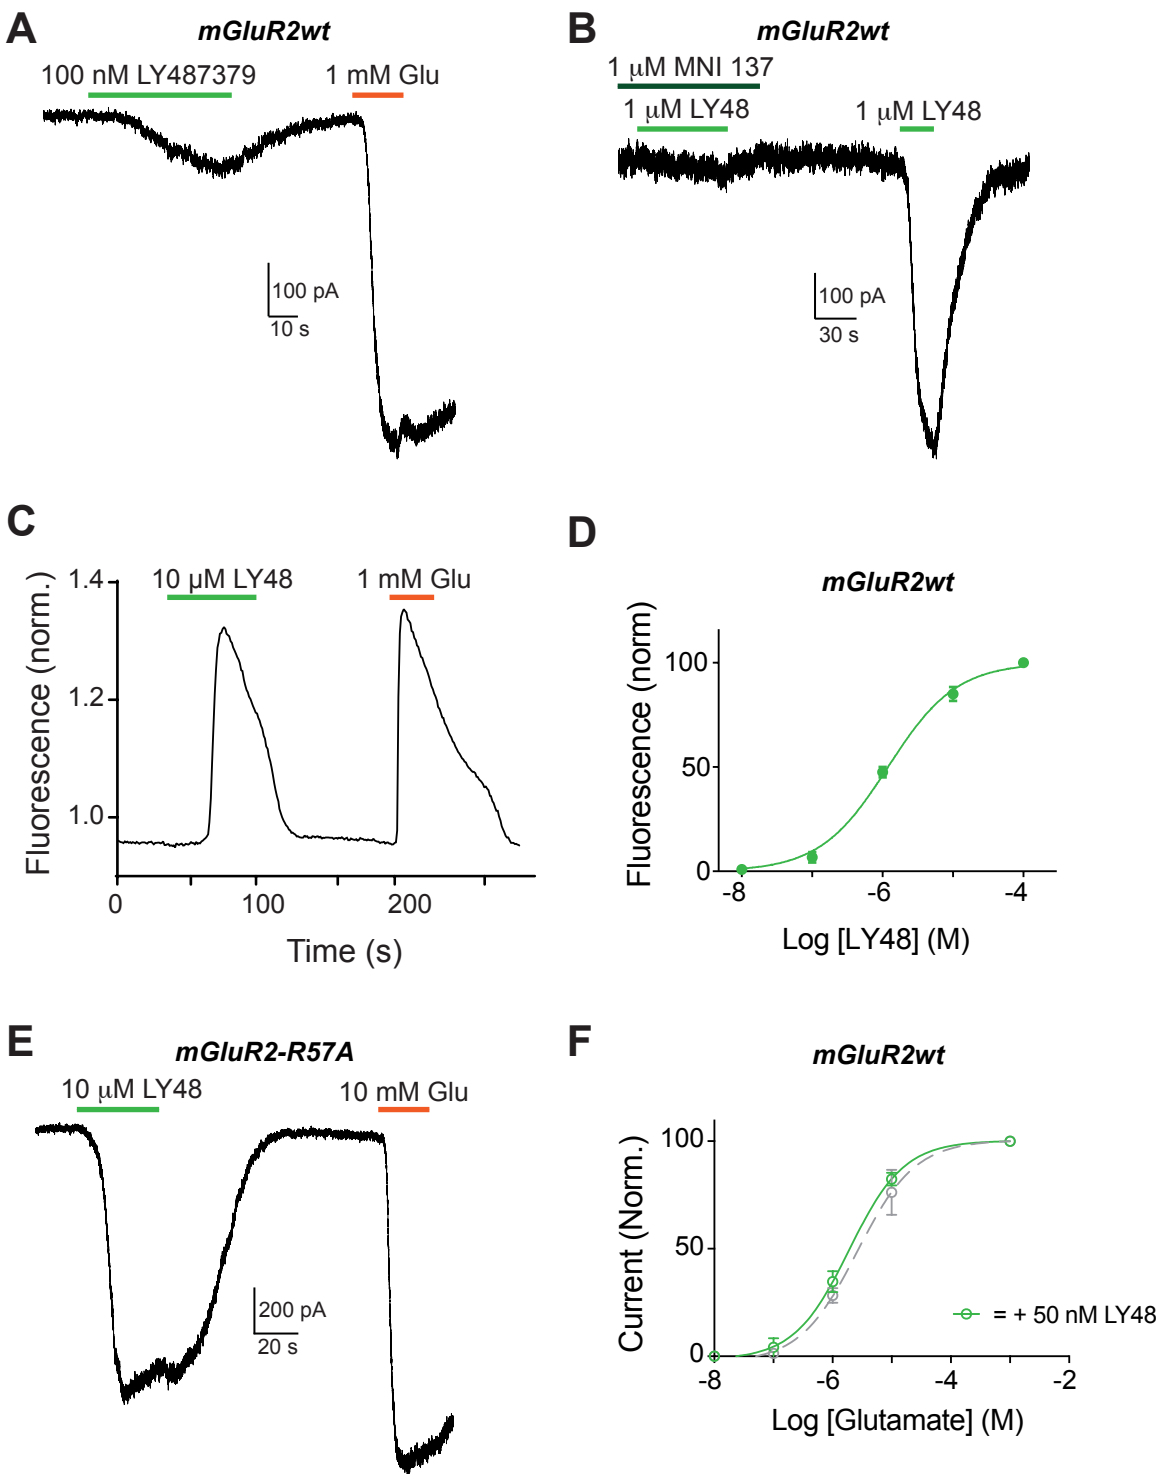

Supplement: supp [file elife-45116-supp-v1.zip]

# Figure 6-figure supplement 1

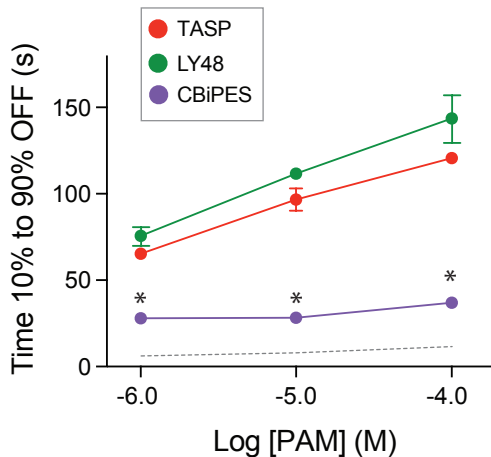

Supplement: supp [file elife-45116-supp-v1.zip]

**Figure 1-figure supplement 3**

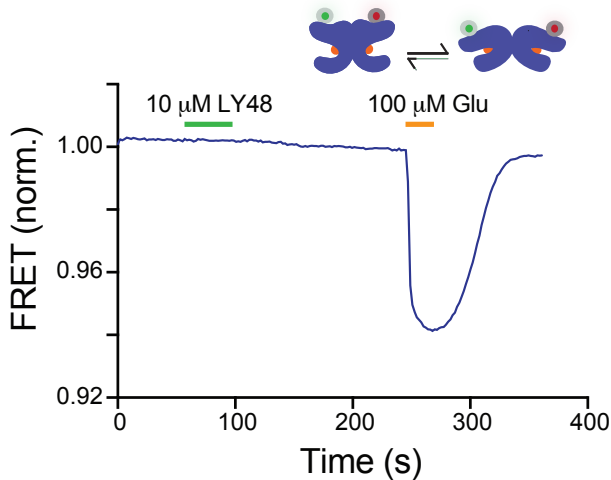

Supplement: supp [file elife-45116-supp-v1.zip]

**Figure 6-figure supplement 3**

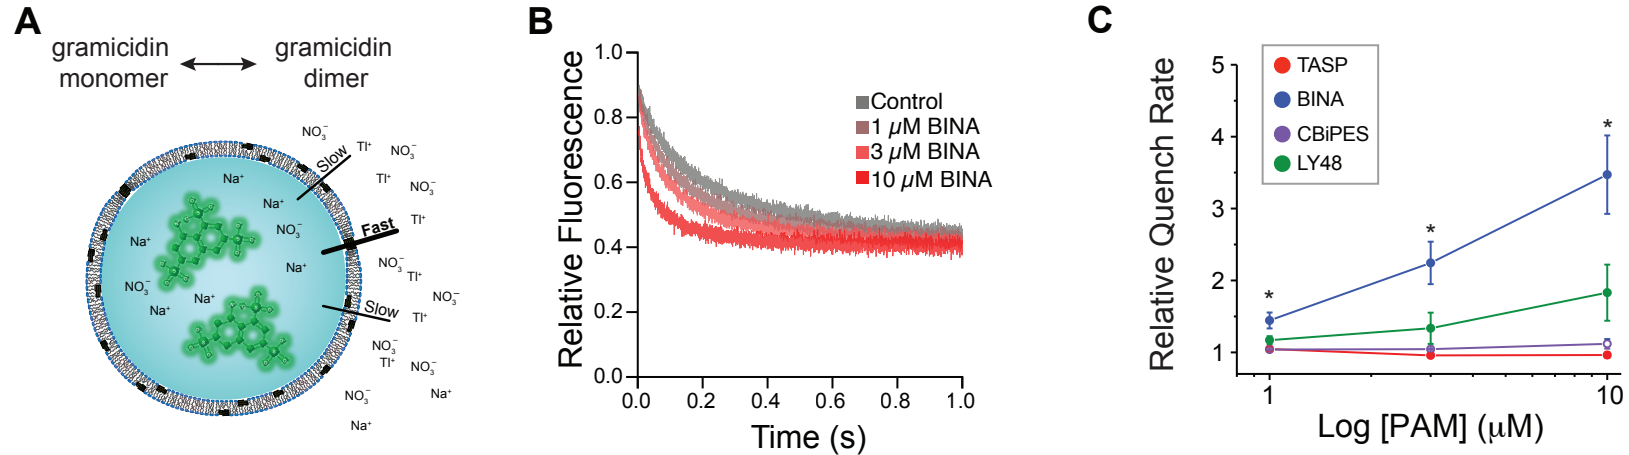

Supplement: supp [file elife-45116-supp-v1.zip]

# Figure 2-figure supplement 1

**A**

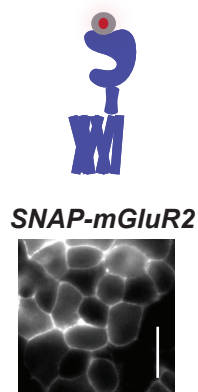

**B**

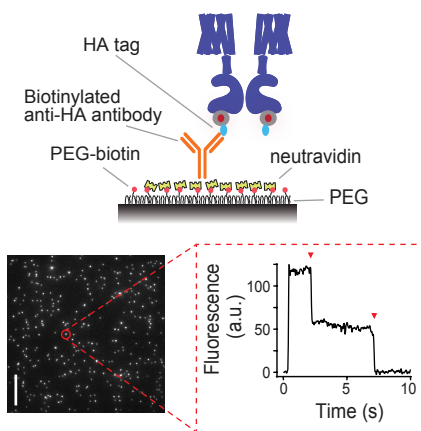

**C**

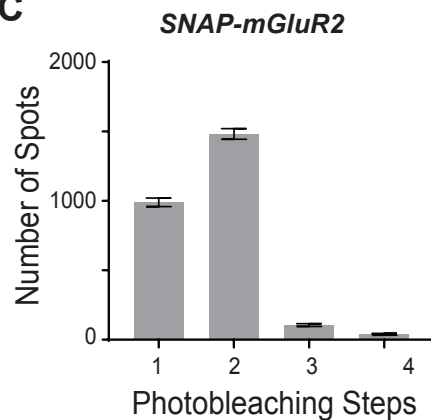

**D**

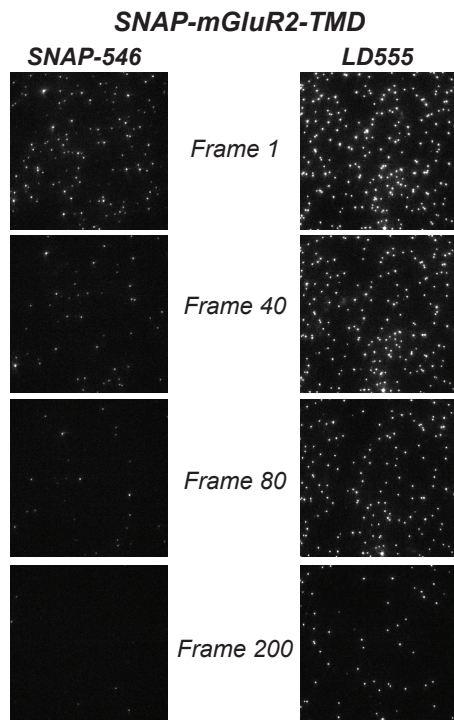

**E**

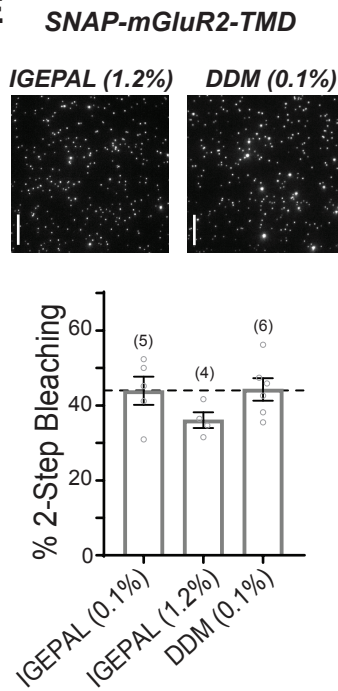

**F**

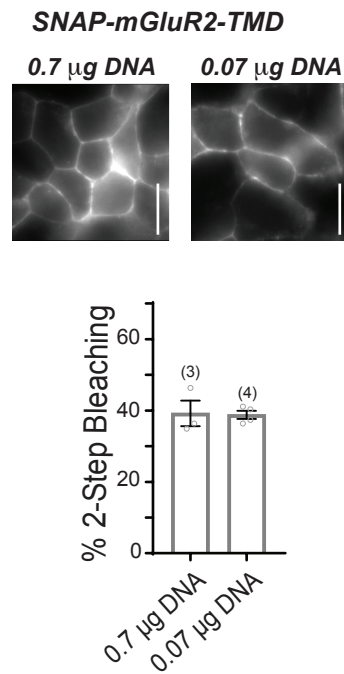

Supplement: supp [file elife-45116-supp-v1.zip]

# Figure 4-figure supplement 2

**A**

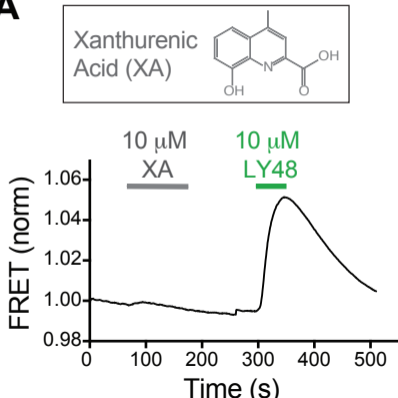

**B**

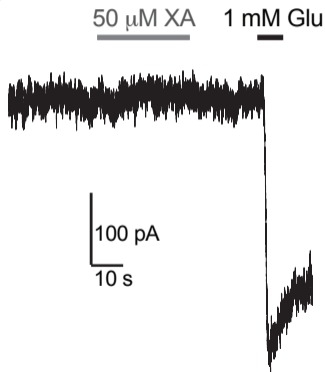

Supplement: supp [file elife-45116-supp-v1.zip › elife_poa_e45116_Figure_4_figure_supplement_2.pdf]

**Figure 6-figure supplement 2**

**A**

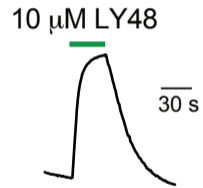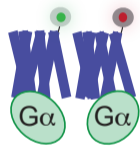

**B**

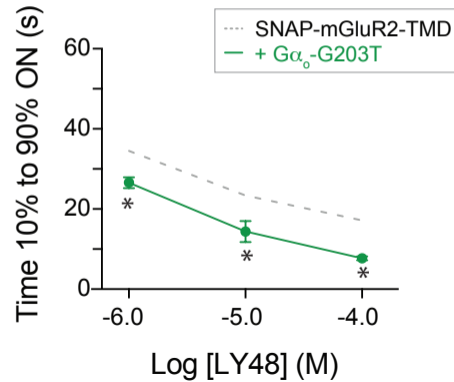

**C**

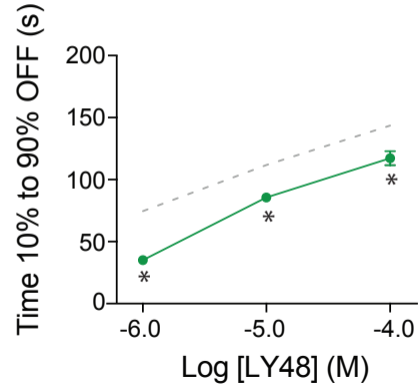

Supplement: supp [file elife-45116-supp-v1.zip › elife_poa_e45116_Figure_6_figure_supplement_2.pdf]

# Figure 7-figure supplement 1

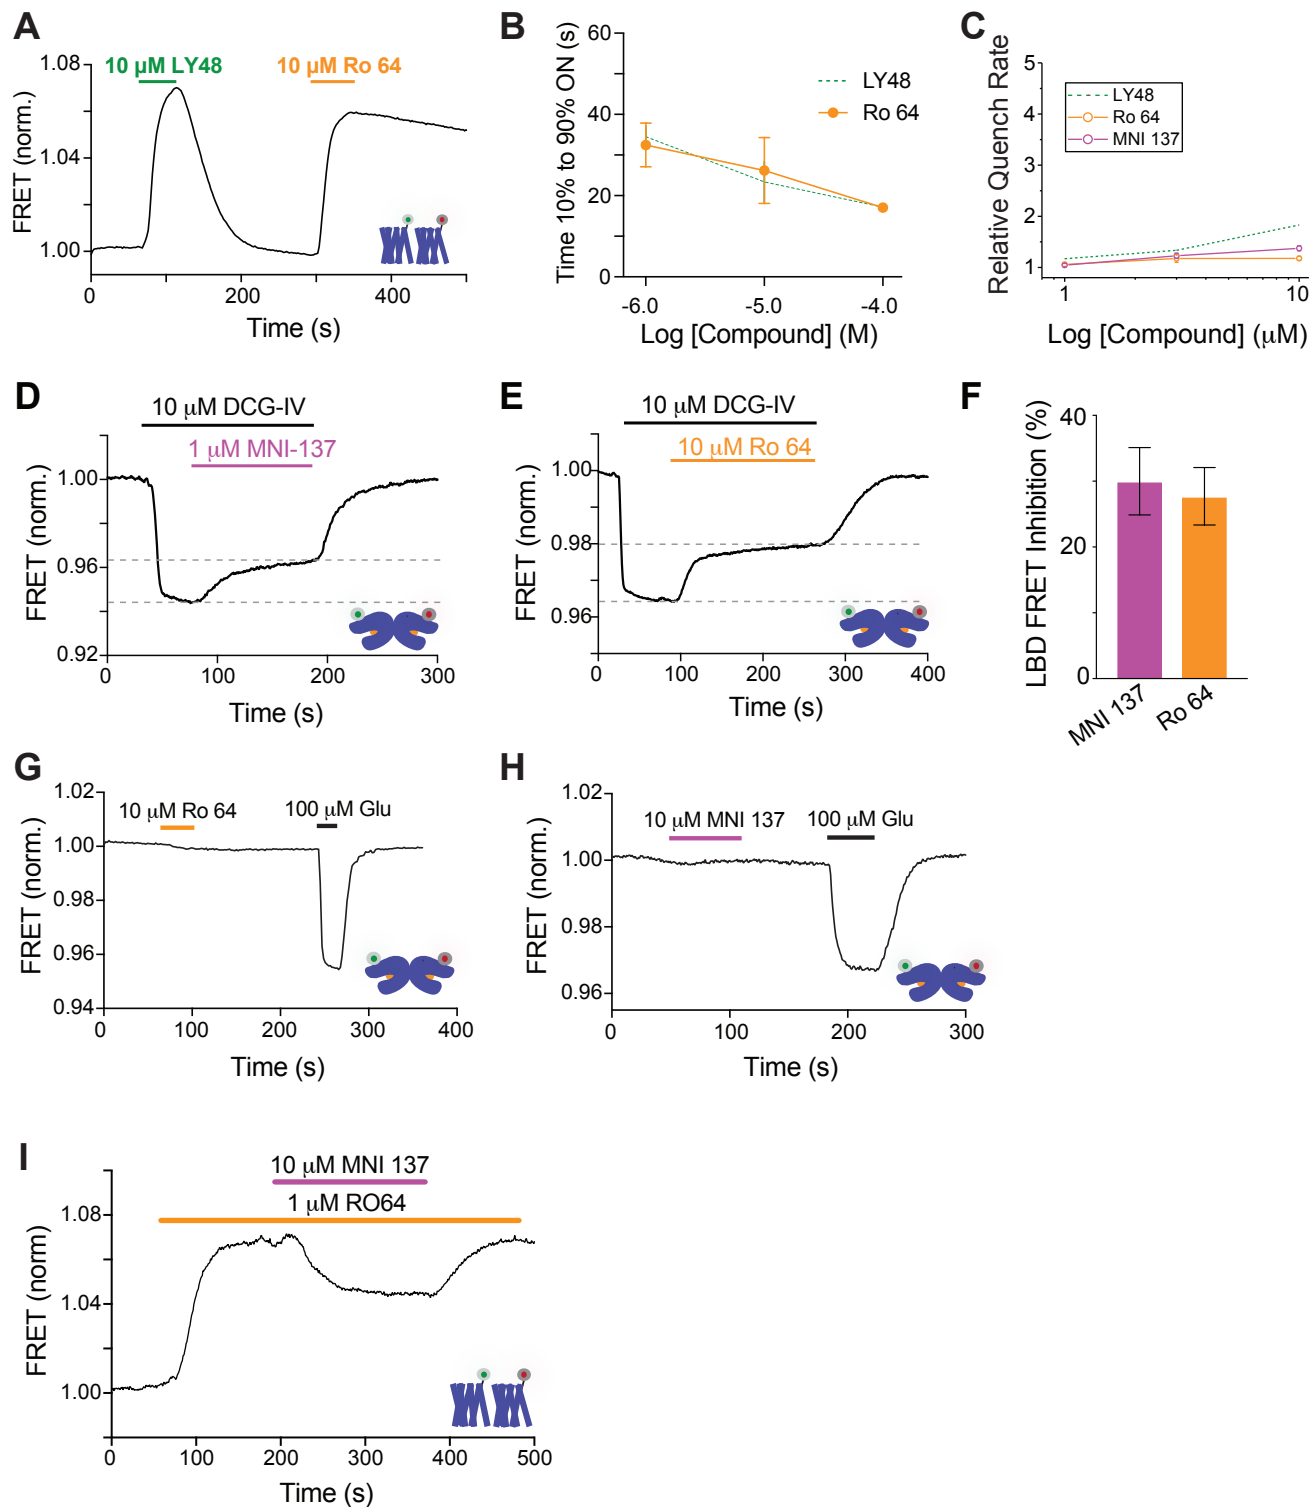

Supplement: supp [file elife-45116-supp-v1.zip › elife_poa_e45116_Figure_7_figure_supplement_1.pdf]

# Figure 2-figure supplement 3

**A**

***SNAP-mGluR2-TMD***

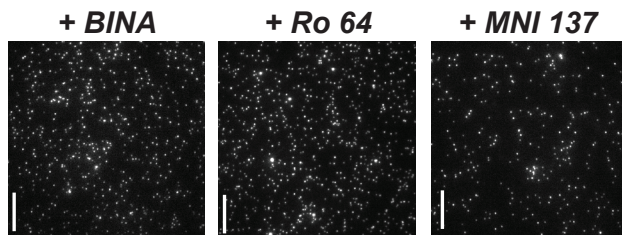

**B**

***SNAP-mGluR2***

**+ *glutamate***

**+ *glutamate*  
and *LY48***

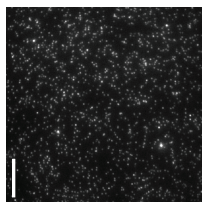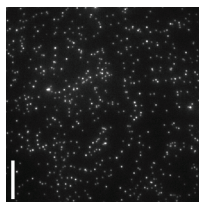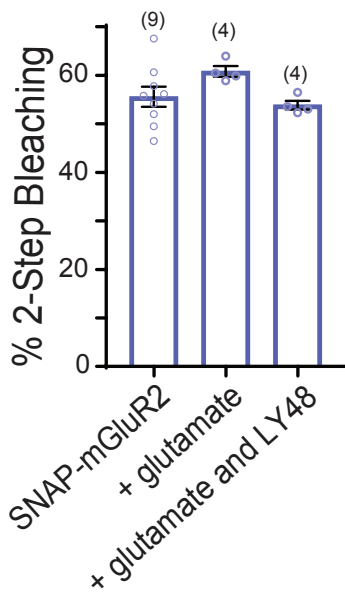

Supplement: supp [file elife-45116-supp-v1.zip › elife_poa_e45116_Figure_2_figure_supplement_3.pdf]
